# Supplementary material
Source: PubMed Central journal article supplement (PMC3083800)
Supplement: JCI44447sd.pdf [file JCI44447sd.pdf]

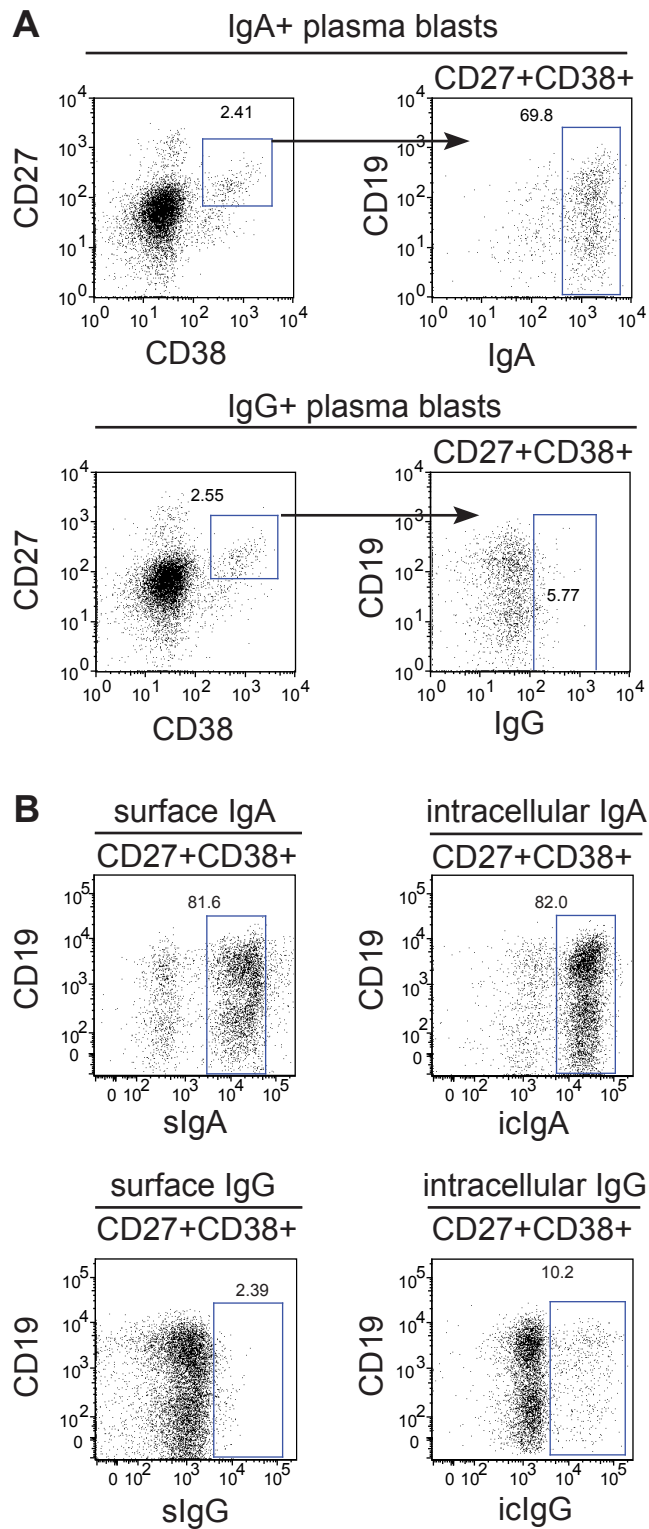

**Figure S1: FACS-based isolation strategy of single intestinal IgA+ and IgG+ plasma blasts**  
Purified intestinal lymphocytes from healthy donors were (A) surface labeled with fluorochrome-coupled anti-CD27, anti-CD38, anti-CD19 and anti-IgA or anti-IgG antibodies, respectively. CD27+CD38+ cells were gated and analyzed for CD19 and Ig isotype expression. Sort gates for FACS single cell isolation of CD27+CD38+CD19+/-IgA+ and CD27+CD38+CD19+/-IgG+ B cells are shown. (B) Comparison of surface (s) and intracellular (ic) IgA and IgG staining for purified intestinal CD27+CD38+CD19+/- lymphocytes.

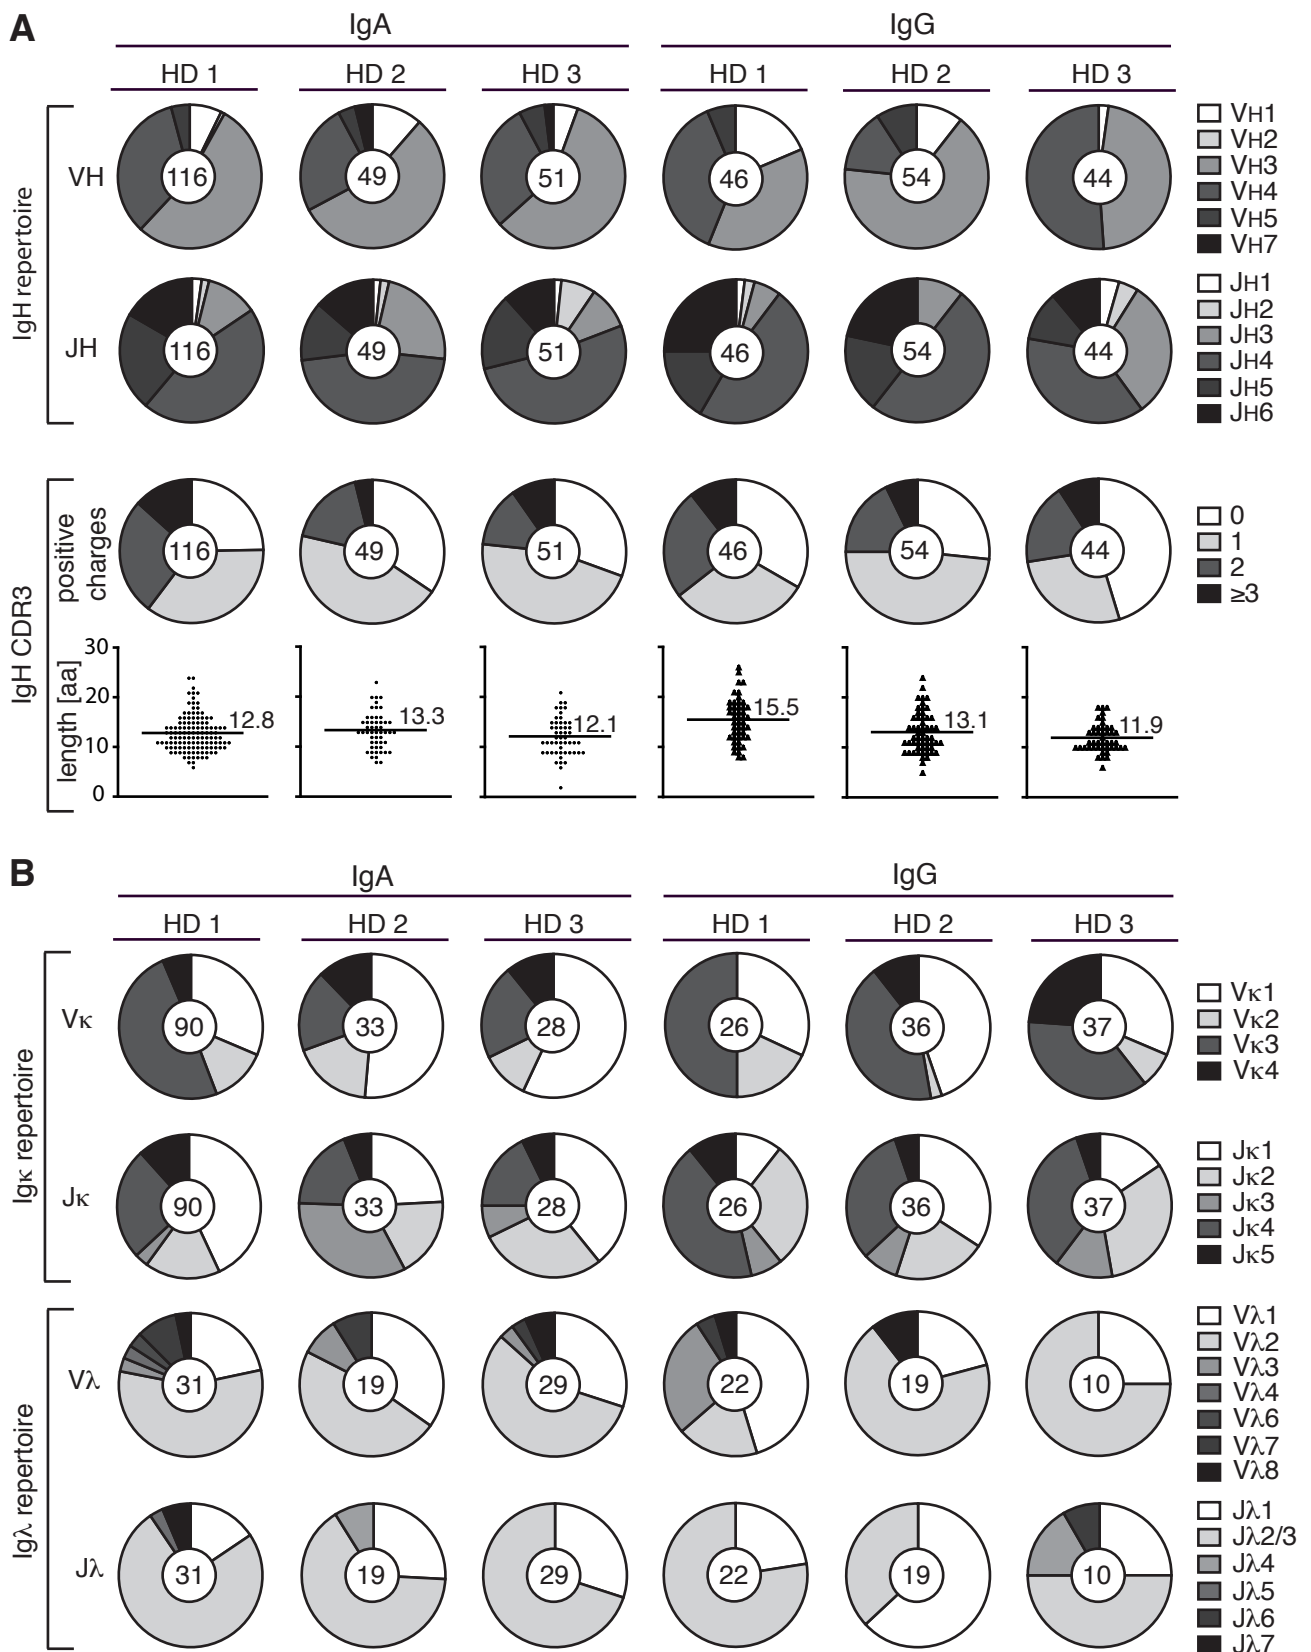

**Figure S2: *Ig* gene repertoire and *Ig* gene features of IgA<sup>+</sup> and IgG<sup>+</sup> intestinal plasma blasts in three donors.**

(A) The *Igh* gene sequences of IgA<sup>+</sup> and IgG<sup>+</sup> plasma blasts from terminal ileum of three donors were analyzed for *Igh* V family and J gene usage, absolute and average CDR3 aa length and CDR3 positive charges. The absolute number of sequences analyzed is indicated. (B), *Igk* and *Igl* V family and J gene usage. The absolute number of sequences analyzed is indicated in each pie chart center.

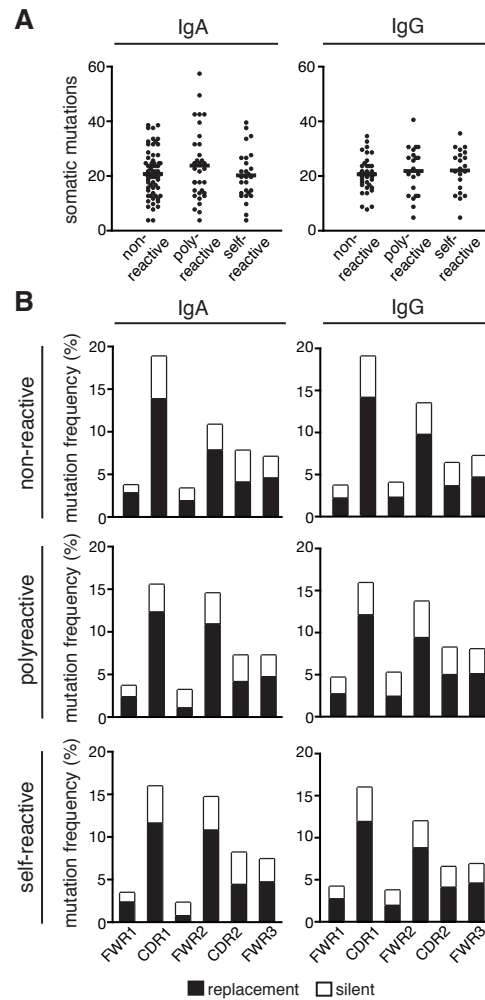

**Figure S3: Somatic mutations of intestinal plasma blast antibodies**  
 The *Igh* gene sequences of non-reactive, polyreactive and self-reactive IgA+ and IgG+ plasma blasts from terminal ileum of HD1-HD3 were analyzed for (A) absolute number of somatic mutations in V genes and (B) frequency of replacement (black) and silent (white) mutations in FWR and CDR. Horizontal lines in A indicate average means of V gene somatic mutations.

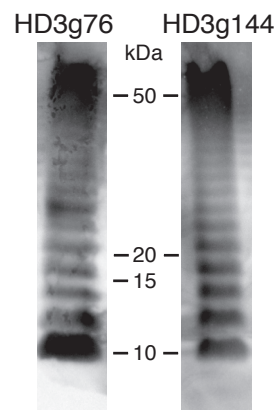

**Figure S4: LPS reactivity of intestinal antibodies.**

Western blot of extracted LPS from *E. coli* after separation by SDS page using *E. coli* reactive recombinant monoclonal antibodies HD3g76 and HD3g144 identifies LPS as cognate antigen. The molecular weight marker is indicated for comparison.











Table S3: Ig gene analysis and antibody reactivity of IgA+ and IgG+ intestinal plasma blasts form HD3

| Antibody |          | IgH    |    |         | IgL                    |              |       |    | Antibody reactivity |              |      |     |               |              |              |                  |                         |                       |                      |                     |                        |                       |                             |                         |           |       |
|----------|----------|--------|----|---------|------------------------|--------------|-------|----|---------------------|--------------|------|-----|---------------|--------------|--------------|------------------|-------------------------|-----------------------|----------------------|---------------------|------------------------|-----------------------|-----------------------------|-------------------------|-----------|-------|
| patient  | antibody | VH     | JH | isotype | CDR3                   | VH mutations | Vκ    | Jκ | CDR3                | Vκ mutations | VA   | JA  | CDR3          | VA mutations | polyreactive | Escherichia coli | Escherichia coli Nissle | Enterococcus faecalis | Enterobacter cloacae | Morganella morganii | Salmonella typhimurium | Lactobacillus reuteri | Bacteroides thetaotaomicron | rotavirus like particle | intestine | HEp-2 |
| HD3a     | 1        | 3-21   | 2  | IgA2    | PYYGSGNLGDWYFDL        | 4            |       |    |                     |              | 1-40 | 2/3 | QSYDSSLSAVV   | nd           | /            | /                | /                       | /                     | /                    | /                   | /                      | /                     | /                           | /                       | /         | /     |
| HD3a     | 2#       | 3-7    | 3  | IgA1    | RTLVRANAFDI            | 14           |       |    |                     |              | 2-8  | 3   | SSYAGRNNWV    | nd           | /            | /                | /                       | /                     | /                    | /                   | /                      | /                     | /                           | /                       | /         | /     |
| HD3a     | 6#       | 3-23   | 5  | IgA2    | GGYGSSWF               | 7            | 1-16  | 5  | QQYNSYPIT           | 3            |      |     |               |              | +            | +                | +                       | +                     | +                    | +                   | +                      | +                     | +                           | +                       | +         | /     |
| HD3a     | 10#      | 3-74   | 6  | IgA2    | DWRNGGMDV              | 28           |       |    |                     |              | 2-14 | 1   | SSKRISSTLAPYV | 12           | /            | /                | /                       | /                     | /                    | /                   | /                      | /                     | /                           | /                       | /         | /     |
| HD3a     | 14k      | 1-8    | 4  | IgA1    | SGFGAPVNFHDH           | 8            | 1-39  | 1  | QQSFETRA            | 14           | 2-11 | 1   | SSYAGSPYV     | 20           | +            | +                | +                       | +                     | +                    | +                   | +                      | +                     | +                           | +                       | +         | /     |
| HD3a     | 14L      | 3-30   | 5  | IgA2    | DLYQMLYGEVMDSD         | 17           | 3-11  | 4  | QQRSHWPPLT          | 17           |      |     |               |              | /            | /                | /                       | /                     | /                    | /                   | /                      | /                     | /                           | /                       | /         | /     |
| HD3a     | 33#      | 3-74   | 4  | IgA2    | RFDYAD                 | 25           | 4-1   | 4  | QQYSTPLT            | 9            |      |     |               |              | /            | /                | /                       | /                     | /                    | /                   | /                      | /                     | /                           | /                       | /         | /     |
| HD3a     | 35#      | 4-34   | 4  | IgA2    | GRSGTVAEN              | 21           |       |    |                     |              | 1-44 | 3   | SAWHISLNFVW   | nd           |              |                  |                         |                       |                      |                     |                        |                       |                             |                         |           |       |
| HD3a     | 41       | 1-3    | 4  | IgA2    | GFSGWGHFDY             | 14           | 1-5   | 1  | QQYDSFPRT           | 17           |      |     |               |              | +            | +                | +                       | +                     | +                    | +                   | +                      | +                     | +                           | +                       | +         | C     |
| HD3a     | 43#      | 5-51   | 3  | IgA2    | SAYSSTWYGAFDI          | 9            | 3-20  | 2  | LQYGRHPGT           | 14           |      |     |               |              |              |                  |                         |                       |                      |                     |                        |                       |                             |                         |           |       |
| HD3a     | 47#      | 4-61   | 5  | IgA2    | QLVYHRLGNSYAHWFDS      | nd           |       |    |                     |              | 2-14 | 2/3 | SSYTTSGAYVL   | 8            |              |                  |                         |                       |                      |                     |                        |                       |                             |                         |           |       |
| HD3a     | 53       | 3-74   | 6  | IgA2    | DWRNGGMDV              | 27           |       |    |                     |              | 2-14 | 1   | SSKRISSTLAPYV | 12           | /            | /                | /                       | /                     | /                    | /                   | /                      | /                     | /                           | /                       | /         | C     |
| HD3a     | 55       | 3-7    | 3  | IgA1    | DLTPETSGHYFDALDI       | 20           | 1-6   | 1  | LQDYNYPRT           | 10           |      |     |               |              | /            | /                | /                       | /                     | /                    | /                   | /                      | /                     | /                           | /                       | /         | /     |
| HD3a     | 62#      | 3-7    | 4  | IgA2    | APSPGLDY               | 16           |       |    |                     |              | 2-14 | 2/3 | GCHTSRIPVL    | 9            |              |                  |                         |                       |                      |                     |                        |                       |                             |                         |           | /     |
| HD3a     | 67#      | 4-59   | 4  | IgA1    | WGRSSVVFVPGAIDN        | nd           |       |    |                     |              | 2-14 | 3   | TSWRGTTTFELEV | 23           |              |                  |                         |                       |                      |                     |                        |                       |                             |                         |           | /     |
| HD3a     | 72#      | 4-59   | 4  | IgA2    | LLGORTACLDS            | 29           |       |    |                     |              | 1-44 | 3   | AAWDEILNGPWV  | nd           |              |                  |                         |                       |                      |                     |                        |                       |                             |                         |           | /     |
| HD3a     | 75       | 1-8    | 4  | IgA1    | SGFGAPVNFHDH           | 9            | 1-39  | 1  | QQSFETRA            | 14           |      |     |               |              | /            | /                | /                       | /                     | /                    | /                   | /                      | /                     | /                           | /                       | /         | /     |
| HD3a     | 78#      | 7-4-1  | 4  | IgA2    | LLRATAPSDN             | nd           |       |    |                     |              | 2-14 | 1   | STYTTNTRV     |              |              |                  |                         |                       |                      |                     |                        |                       |                             |                         |           | /     |
| HD3a     | 83       | 4-59   | 2  | IgA1    | VRTTSYYPNWFYFDL        | 14           |       |    |                     |              | 2-11 | 2/3 | CSYGGSHTMPV   | 12           | +            | +                | +                       | +                     | +                    | +                   | +                      | +                     | +                           | +                       | +         | C     |
| HD3a     | 84       | 5-51   | 4  | IgA1    | HLAAHCSGNSCSYFYDY      | 20           |       |    |                     |              | 1-44 | 2/3 | AAWDDSRNGVW   | 8            | /            | /                | /                       | /                     | /                    | /                   | /                      | /                     | /                           | /                       | /         | N     |
| HD3a     | 86#      | 3-23   | 2  | IgA2    | DLTIVWYLDV             | 17           | 4-1   | 2  | QQYFSTPRT           | 17           |      |     |               |              |              |                  |                         |                       |                      |                     |                        |                       |                             |                         |           | /     |
| HD3a     | 87       | 4-5    | 5  | IgA1    | TVPAPSLGAIAAAGASS      | 50           | 1-5   | 1  | QHYSYWWT            | 19           |      |     |               |              | +            | +                | +                       | +                     | +                    | +                   | +                      | +                     | +                           | +                       | +         | /     |
| HD3a     | 92#      | 3-23   | 4  | IgA2    | APSGCTGECFLMDY         | nd           | 1-5   | 1  | QQCNTYLRT           | 6            |      |     |               |              |              |                  |                         |                       |                      |                     |                        |                       |                             |                         |           | /     |
| HD3a     | 94k      | 4-39   | 5  | IgA2    | DGDLAATGNGLNS          | 36           | 1-5   | 1  | QQYKTYKT            | 18           |      |     |               |              | /            | /                | /                       | /                     | /                    | /                   | /                      | /                     | /                           | /                       | /         | /     |
| HD3a     | 94L#     | 4-39   | 5  | IgA2    | DGDLAATGNGLNS          | 36           |       |    |                     |              | 2-14 | 3   | TSYSFSSSTVW   | nd           |              |                  |                         |                       |                      |                     |                        |                       |                             |                         |           | /     |
| HD3a     | 96#      | 3-7    | 4  | IgA2    | GWGLDQ                 | nd           | 2-29  | 4  | METTHVPPV           | 4            |      |     |               |              | /            | /                | /                       | /                     | /                    | /                   | /                      | /                     | /                           | /                       | /         | /     |
| HD3a     | 101      | 3-23   | 4  | IgA2    | GSSIIDY                | 27           | 2-30  | 2  | MQGSHWPFT           | 12           |      |     |               |              | /            | /                | /                       | /                     | /                    | /                   | /                      | /                     | /                           | /                       | /         | /     |
| HD3a     | 103      | 3-15   | 5  | IgA2    | HPGGSCPGATCLRS         | 21           | 3-20  | 3  | QHYGSSPPQLT         | 10           |      |     |               |              | /            | /                | /                       | /                     | /                    | /                   | /                      | /                     | /                           | /                       | /         | C     |
| HD3a     | 111#     | 3-7    | 4  | IgA2    | VGHSTTWFGYFDSD         | 12           |       |    |                     |              | 2-11 | 3   | CSYAGGYTYWV   | 10           |              |                  |                         |                       |                      |                     |                        |                       |                             |                         |           | /     |
| HD3a     | 113      | 4-28   | 3  | IgA2    | TRSNPSIDAFDV           | 23           |       |    |                     |              | 8-61 | 3   | VLYMGSGIIV    | 4            | +            | +                | +                       | +                     | +                    | +                   | +                      | +                     | +                           | +                       | +         | N     |
| HD3a     | 119      | 3-23   | 4  | IgA2    | RSASGTFYFDY            | 21           |       |    |                     |              | 2-11 | 3   | CSYAGSYTWV    | 9            | +            | +                | +                       | +                     | +                    | +                   | +                      | +                     | +                           | +                       | +         | /     |
| HD3a     | 125#     | 4-39   | 4  | IgA1    | DWRQSGGWYSSGS          | 41           | 3-11  | 4  | QQRSAWPLI           | 15           |      |     |               |              | /            | /                | /                       | /                     | /                    | /                   | /                      | /                     | /                           | /                       | /         | /     |
| HD3a     | 130      | 5-51   | 1  | IgA2    | SGGLGYCGDRNCYPENFHH    | 20           | 2-30  | 1  | MQGIQWPWT           | 19           |      |     |               |              | /            | /                | /                       | /                     | /                    | /                   | /                      | /                     | /                           | /                       | /         | N     |
| HD3a     | 132      | 4-39   | 6  | IgA2    | GHVSGTYGLDV            | 43           |       |    |                     |              | 2-14 | 2/3 | SSYSSTTTVL    | nd           | +            | +                | +                       | +                     | +                    | +                   | +                      | +                     | +                           | +                       | +         | /     |
| HD3a     | 133      | 3-23   | 4  | IgA2    | HRAGNDY                | 22           | 1-9   | 5  | QQVNSYPRT           | 21           |      |     |               |              | /            | +                | +                       | +                     | +                    | +                   | +                      | +                     | +                           | +                       | +         | /     |
| HD3a     | 134      | 3-30   | 4  | IgA2    | RAESGSHKSIIEY          | 34           |       |    |                     |              | 2-14 | 1   | CSYTTSGTFV    | nd           | /            | /                | /                       | /                     | /                    | /                   | /                      | /                     | /                           | /                       | /         | /     |
| HD3a     | 135#     | 3-23   | 4  | IgA2    | EPTVTIWRGVLDS          | 20           | 1-39  | 2  | QQSYNSPOYT          | 23           |      |     |               |              |              |                  |                         |                       |                      |                     |                        |                       |                             |                         |           | /     |
| HD3a     | 139      | 4-61   | 4  | IgA1    | DQVPYYDIFATASYKEQYFLDS | 23           |       |    |                     |              | 1-44 | 3   | AAWDDNLNGL    | 15           | +            | +                | +                       | +                     | +                    | +                   | +                      | +                     | +                           | +                       | +         | /     |
| HD3a     | 140      | 3-7    | 4  | IgA2    | GRAVATDY               | 12           | 1-6   | 1  | LQDNDKPLT           | 26           |      |     |               |              | +            | +                | +                       | +                     | +                    | +                   | +                      | +                     | +                           | +                       | +         | /     |
| HD3a     | 143      | 3-30   | 4  | IgA2    | EIRGYYSAL              | 19           | 1-9   | 2  | QQLNTYPT            | 8            |      |     |               |              |              |                  |                         |                       |                      |                     |                        |                       |                             |                         |           | /     |
| HD3a     | 144      | 3-66   | 6  | IgA2    | FV                     | 22           |       |    |                     |              | 7-46 | 3   | AFSHNGHWT     | 30           | +            | +                | +                       | +                     | +                    | +                   | +                      | +                     | +                           | +                       | +         | C+N   |
| HD3a     | 146      | 3-74   | 6  | IgA2    | DWRNGGMDV              | 28           |       |    |                     |              | 2-14 | 1   | SSKRISSTLAPYV | 12           | /            | /                | /                       | /                     | /                    | /                   | /                      | /                     | /                           | /                       | /         | /     |
| HD3a     | 147      | 3-23   | 4  | IgA1    | DLWRRDGGGLGPFDFY       | 15           |       |    |                     |              | 2-14 | 2/3 | MSSTSSSTVL    | 14           | /            | /                | /                       | /                     | /                    | /                   | /                      | /                     | /                           | /                       | /         | C     |
| HD3a     | 153#     | 3-23   | 2  | IgA2    | DVSDIALLVPPRGDYLDL     | 24           |       |    |                     |              | 3-1  | 3   | QTVGSGTAV     | nd           |              |                  |                         |                       |                      |                     |                        |                       |                             |                         |           | /     |
| HD3a     | 157k     | 4-30-4 | 4  | IgA1    | GAVPGRGSALHFDS         | 44           | 1-9   | 4  | QQLSSYPIT           | 26           |      |     |               |              | /            | /                | /                       | /                     | /                    | /                   | /                      | /                     | /                           | /                       | /         | /     |
| HD3a     | 157L#    | 4-30-4 | 4  | IgA1    | GAVPGRGSALHFDS         | 44           |       |    |                     |              | 2-14 | 2/3 | SSYSSTTTVL    | 19           |              |                  |                         |                       |                      |                     |                        |                       |                             |                         |           | /     |
| HD3a     | 158#     | 4-39   | 4  | IgA2    | YDGRWALDQ              | 39           | 1-39  | 1  | HQSSNEAWT           | 11           |      |     |               |              |              |                  |                         |                       |                      |                     |                        |                       |                             |                         |           | /     |
| HD3a     | 159      | 3-7    | 4  | IgA2    | AVIAAALDY              | 22           | 1-6   | 1  | LQDNGYPKT           | 20           |      |     |               |              | /            | /                | /                       | /                     | /                    | /                   | /                      | /                     | /                           | /                       | /         | /     |
| HD3a     | 162#     | 3-11   | 5  | IgA2    | AVGPGVGSASIS           | 24           | 4-1   | 2  | QQYFNTPT            | 25           |      |     |               |              |              |                  |                         |                       |                      |                     |                        |                       |                             |                         |           | /     |
| HD3a     | 163k     | 3-23   | 5  | IgA2    | GSVTALGILDN            | 19           | 3-11  | 2  | QQRSSWPYT           | 9            |      |     |               |              | /            | +                | +                       | +                     | +                    | +                   | +                      | +                     | +                           | +                       | +         | /     |
| HD3a     | 163L     | 3-23   | 5  | IgA2    | GSVTALGILDN            | 19           |       |    |                     |              | 1-36 | 1   | AWDDTLDGYV    | 18           | /            | /                | /                       | /                     | /                    | /                   | /                      | /                     | /                           | /                       | /         | /     |
| HD3a     | 165k#    | 3-48   | 4  | IgA2    | DDAYYDNTNYSYLDY        | 16           | 1-39  | 2  | QQSYSTHPYT          | 13           |      |     |               |              |              |                  |                         |                       |                      |                     |                        |                       |                             |                         |           | /     |
| HD3a     | 165L     | 3-48   | 4  | IgA2    | DDAYYDNTNYSYLDY        | 16           |       |    |                     |              | 1-40 | 1   | QSYDTSNLNGRV  | 10           | /            | /                | /                       | /                     | /                    | /                   | /                      | /                     | /                           | /                       | /         | /     |
| HD3a     | 169k#    | 4-34   | 6  | IgA1    | REKKRTRVRYLDV          | 19           | 3-20  | 3  | QHYVGSLLFT          | 9            |      |     |               |              |              |                  |                         |                       |                      |                     |                        |                       |                             |                         |           | /     |
| HD3a     | 169L#    | 4-34   | 6  | IgA1    | REKKRTRVRYLDV          | 19           |       |    |                     |              | 1-44 | 1   | AAWDDGLRSYL   | nd           |              |                  |                         |                       |                      |                     |                        |                       |                             |                         |           | /     |
| HD3a     | 171#     | 4-59   | 5  | IgA1    | NRLPHDNDSKTYVNFDFP     | nd           |       |    |                     |              | 1-44 | 3   | AAWDDSLNGCWL  | 12           |              |                  |                         |                       |                      |                     |                        |                       |                             |                         |           | /     |
| HD3g     | 7        | 3-66   | 6  | IgG1    | EQVREPMDSKVIAEAMDV     | 24           | 3-15  | 1  | HQYNNWWT            | 15           |      |     |               |              | /            | /                | /                       | /                     | /                    | /                   | /                      | /                     | /                           | /                       | /         | /     |
| HD3g     | 10       | 4-59   | 3  | IgG4    | NSTSTSLPDI             | 22           | 4-1   | 4  | QQYCTPFT            | 16           |      |     |               |              | /            | /                | /                       | /                     | /                    | /                   | /                      | /                     | /                           | /                       | /         | /     |
| HD3g     | 13       | 4-59   | 3  | IgG4    | NSTSSPLDI              | 24           | 4-1   | 4  | QQYCTNPFT           | 16           |      |     |               |              | /            | /                | /                       | /                     | /                    | /                   | /                      | /                     | /                           | /                       | /         | /     |
| HD3g     | 16       | 4-30-4 | 3  | IgG2    | EVLSPVDSADFV           | 33           | 3-15  | 4  | QHYNLPLT            | 10           |      |     |               |              | /            | /                | /                       | /                     | /                    | /                   | /                      | /                     | /                           | /                       | /         | /     |
| HD3g     | 19       | 4-59   | 3  | IgG4    | NSSSSPLDV              | 22           | 4-1   | 4  | QQYCTPFT            | 21           |      |     |               |              | /            | /                | /                       | /                     | /                    | /                   | /                      | /                     | /                           | /                       | /         | C     |
| HD3g     | 26       | 1-46   | 5  | IgG2    | DPSLRDRSSGRWLDP        | 21           |       |    |                     |              | 2-11 | 3   | CSYAGRYTWV    | 12           | /            | /                | /                       | /                     | /                    | /                   | /                      | /                     | /                           | /                       | /         | /     |
| HD3g     | 28       | 4-4    | 5  | IgG2    | REYRLGYWGFDP           | 20           | 3-15  | 2  | QQYANWPPGYT         | 21           |      |     |               |              | /            | +                | +                       | +                     | +                    | +                   | +                      | +                     | +                           | +                       | +         | /     |
| HD3g     | 31#      | 3-21   | 4  | IgG1    | GFSSRYAFDY             | 29           | 3-20  | 3  | QQYGTSPFT           | 7            |      |     |               |              |              |                  |                         |                       |                      |                     |                        |                       |                             |                         |           | /     |
| HD3g     | 32#      | 3-48   | 6  | IgG2    | DRHYDAGRDHNYGMDV       | 20           | 1D-39 | 2  | QQSYSTRPYT          | 15           |      |     |               |              |              |                  |                         |                       |                      |                     |                        |                       |                             |                         |           | /     |
| HD3g     | 34       | 4-39   | 5  | IgG2    | TGRRYTLGA              | 21           | 2D-28 | 4  | MQALQTPFT           | 9            |      |     |               |              | /            | /                | /                       | /                     | /                    | /                   | /                      | /                     | /                           | /                       | /         | /     |
| HD3g     | 37       | 3-23   | 4  | IgG2    | DRGGLISKFDY            | 12           |       |    |                     |              | 2-14 | 1   | NSHTRKNTPGCV  | 13           | /            | /                | /                       | /                     | /                    | /                   | /                      | /                     | /                           | /                       | /         | C     |
| HD3g     | 38#      | 4-39   | 2  | IgG2    | GPYFGTFWYFDL           | 25           |       |    |                     |              | 1-44 | 3   | ATWDDSLNGFWV  | nd           |              |                  |                         |                       |                      |                     |                        |                       |                             |                         |           | /     |
| HD3g     | 39       | 4-39   | 3  | IgG4    | NSTSTSLPDI             | 20           | 4-1   | 4  | QQYCTPFT            | 15           |      |     |               |              | /            | /                | /                       | /                     | /                    | /                   | /                      | /                     | /                           | /                       | /         | /     |
| HD3g     | 41       | 4-59   | 3  | IgG2    | HAYTGTGHDADFJ          | 36           | 1-39  | 1  | QQSHSLPWV           | 24           |      |     |               |              | /            | /                | /                       | /                     | /                    | /                   | /                      | /                     | /                           | /                       | +         | /     |
| HD3g     | 44#      | 3-7    | 6  | IgG2    | GEDLVATTEVLYGLDV       | 35           | 1-6   | 3  | LQDYAPPY            | 15           |      |     |               |              |              |                  |                         |                       |                      |                     |                        |                       |                             |                         |           | /     |
| HD3g     | 50       | 3-23   | 4  | IgG1    | TGFGESSFHDH            | 27           | 1-16  | 3  | QQYSTYPFT           | 18           |      |     |               |              |              |                  |                         |                       |                      |                     |                        |                       |                             |                         |           |       |
